# Supplementary material for: Anthracene appended coumarin derivative as a Cr(iii) selective turn-on fluorescent probe for living cell imaging: a green approach towards speciation studies
Source: Royal Society of Chemistry journal article supplement (doi:10.1039/c2ay25693b), 2012-01-01

## checkCIF/PLATON report

Structure factors have been supplied for datablock(s) be12jea2n

No syntax errors found.    CIF dictionary    Interpreting this report

### Datablock: be12jea2n

---

Bond precision:    C-C = 0.0048 A                      Wavelength=0.71073

Cell:                      a=6.66100                      b=30.08300                      c=17.63500  
                                alpha=90                      beta=99.5200                      gamma=90

Temperature:                      293 K

|                        | Calculated   | Reported      |
|------------------------|--------------|---------------|
| Volume                 | 3485.085     | 3485          |
| Space group            | P 21/n       | ?             |
| Hall group             | -P 2yn       | ?             |
| Moiety formula         | C24 H15 N O2 | ?             |
| Sum formula            | C24 H15 N O2 | C48 H30 N2 O4 |
| Mr                     | 349.37       | 698.74        |
| Dx, g cm <sup>-3</sup> | 1.332        | 1.332         |
| Z                      | 8            | 4             |
| Mu (mm <sup>-1</sup> ) | 0.085        | 0.085         |
| F000                   | 1456.0       | 1456.0        |
| F000'                  | 1456.64      |               |
| h,k,lmax               | 7,35,20      | 7,35,20       |
| Nref                   | 5936         | 5915          |
| Tmin,Tmax              |              |               |
| Tmin'                  |              |               |

Correction method= Not given

Data completeness= 0.996                      Theta(max)= 24.710

R(reflections)= 0.0628( 3206)                      wR2(reflections)= 0.1599( 5915)

S = 1.034                                          Npar= 487

---

The following ALERTS were generated. Each ALERT has the format

**test-name\_ALERT\_alert-type\_alert-level.**

Click on the hyperlinks for more details of the test.

---

#### Alert level A

|                                                                    |   |
|--------------------------------------------------------------------|---|
| PLAT053_ALERT_1_A Minimum Crystal Dimension Missing (or Error) ... | ? |
| PLAT054_ALERT_1_A Medium Crystal Dimension Missing (or Error) ...  | ? |
| PLAT055_ALERT_1_A Maximum Crystal Dimension Missing (or Error) ... | ? |
| PLAT122_ALERT_1_A No _symmetry_space_group_name_H-M Given .....    | ? |

---

**Alert level B**

PLAT052\_ALERT\_1\_B Info on Absorption Correction Method Missing ... ?  
PLAT093\_ALERT\_1\_B No su's on H-atoms, but refinement reported as . mixed

---

**Alert level C**

THETM01\_ALERT\_3\_C The value of  $\sin(\theta_{\max})/\lambda$  is less than 0.590  
Calculated  $\sin(\theta_{\max})/\lambda = 0.5882$   
PLAT045\_ALERT\_1\_C Calculated and Reported Z Differ by ..... 2.00 Ratio  
PLAT141\_ALERT\_4\_C su on a - Axis Small or Missing ..... 0.00000 Ang.  
PLAT142\_ALERT\_4\_C su on b - Axis Small or Missing ..... 0.00000 Ang.  
PLAT143\_ALERT\_4\_C su on c - Axis Small or Missing ..... 0.00000 Ang.  
PLAT145\_ALERT\_4\_C su on beta Small or Missing ..... 0.0000 Deg.  
PLAT151\_ALERT\_1\_C No su (esd) Given on Volume ..... ?  
PLAT250\_ALERT\_2\_C Large U3/U1 Ratio for Average U(i,j) Tensor .... 2.6  
PLAT250\_ALERT\_2\_C Large U3/U1 Ratio for Average U(i,j) Tensor .... 2.3  
PLAT340\_ALERT\_3\_C Low Bond Precision on C-C Bonds ..... 0.0048 Ang

---

**Alert level G**

PLAT005\_ALERT\_5\_G No \_iucr\_refine\_instructions\_details in CIF .... ?  
PLAT128\_ALERT\_4\_G Alternate Setting of Space-group P21/c ..... P21/n  
PLAT194\_ALERT\_1\_G Missing \_cell\_measurement\_reflns\_used datum .... ?  
PLAT195\_ALERT\_1\_G Missing \_cell\_measurement\_theta\_max datum .... ?  
PLAT196\_ALERT\_1\_G Missing \_cell\_measurement\_theta\_min datum .... ?  
PLAT199\_ALERT\_1\_G Check the Reported \_cell\_measurement\_temperature 293 K  
PLAT200\_ALERT\_1\_G Check the Reported \_diffrn\_ambient\_temperature 293 K

---

- 4 **ALERT level A** = Most likely a serious problem - resolve or explain  
2 **ALERT level B** = A potentially serious problem, consider carefully  
10 **ALERT level C** = Check. Ensure it is not caused by an omission or oversight  
7 **ALERT level G** = General information/check it is not something unexpected
- 13 ALERT type 1 CIF construction/syntax error, inconsistent or missing data  
2 ALERT type 2 Indicator that the structure model may be wrong or deficient  
2 ALERT type 3 Indicator that the structure quality may be low  
5 ALERT type 4 Improvement, methodology, query or suggestion  
1 ALERT type 5 Informative message, check
-

It is advisable to attempt to resolve as many as possible of the alerts in all categories. Often the minor alerts point to easily fixed oversights, errors and omissions in your CIF or refinement strategy, so attention to these fine details can be worthwhile. In order to resolve some of the more serious problems it may be necessary to carry out additional measurements or structure refinements. However, the purpose of your study may justify the reported deviations and the more serious of these should normally be commented upon in the discussion or experimental section of a paper or in the "special\_details" fields of the CIF. checkCIF was carefully designed to identify outliers and unusual parameters, but every test has its limitations and alerts that are not important in a particular case may appear. Conversely, the absence of alerts does not guarantee there are no aspects of the results needing attention. It is up to the individual to critically assess their own results and, if necessary, seek expert advice.

### **Publication of your CIF in IUCr journals**

A basic structural check has been run on your CIF. These basic checks will be run on all CIFs submitted for publication in IUCr journals (*Acta Crystallographica*, *Journal of Applied Crystallography*, *Journal of Synchrotron Radiation*); however, if you intend to submit to *Acta Crystallographica Section C* or *E*, you should make sure that full publication checks are run on the final version of your CIF prior to submission.

### **Publication of your CIF in other journals**

Please refer to the *Notes for Authors* of the relevant journal for any special instructions relating to CIF submission.

---

**PLATON version of 19/04/2012; check.def file version of 14/04/2012**

Datablock be12jea2n - ellipsoid plot

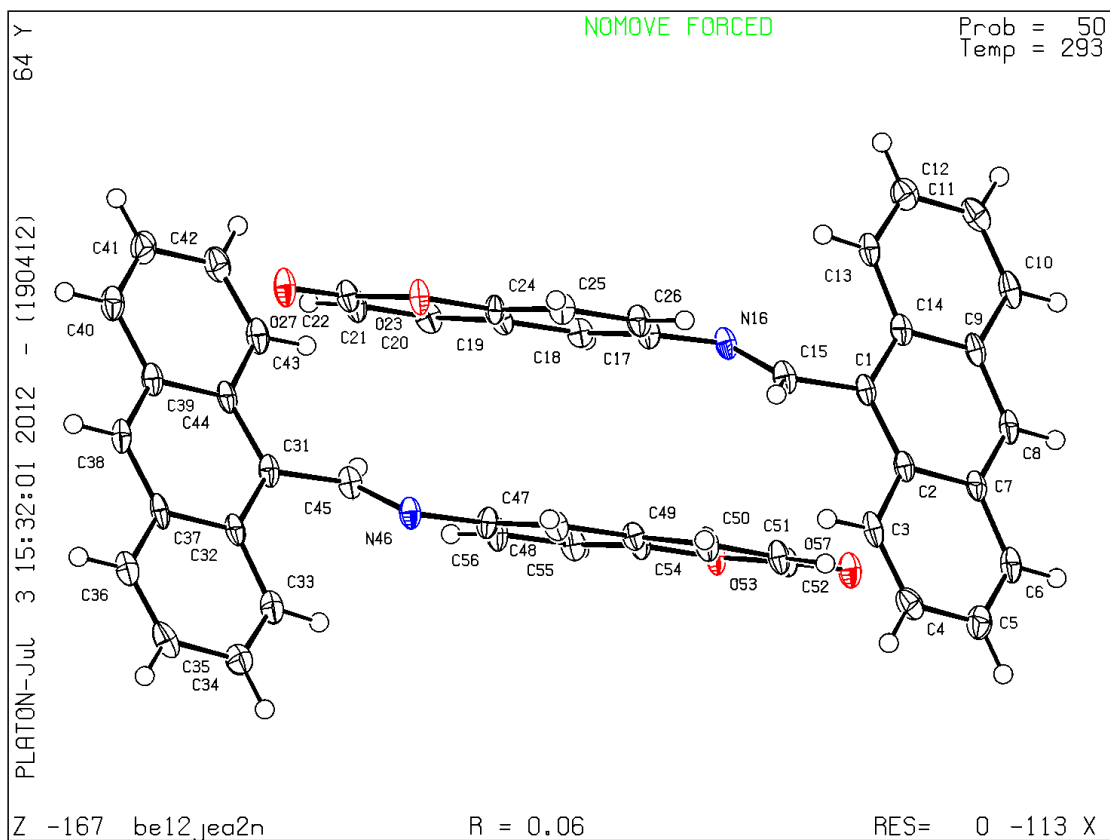

Supplement: c2ay25693b.pdf [file c2ay25693b.pdf]
